# Supplementary material
Source: PubMed Central journal article supplement (PMC4796921)

### Location:

Colored dot on the right side indicates presence of phylotype.

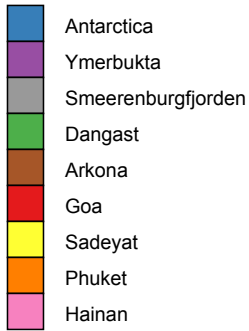

### Phylogeny:

Background color indicates affiliation to family level lineage of known SRM.

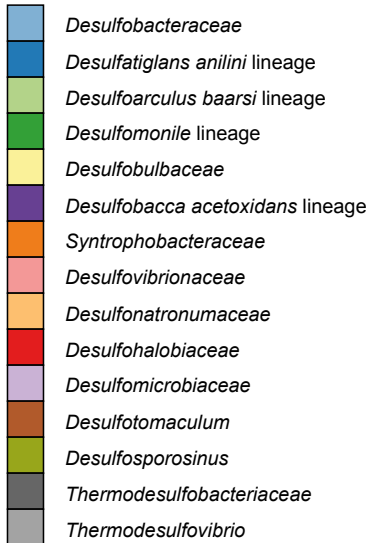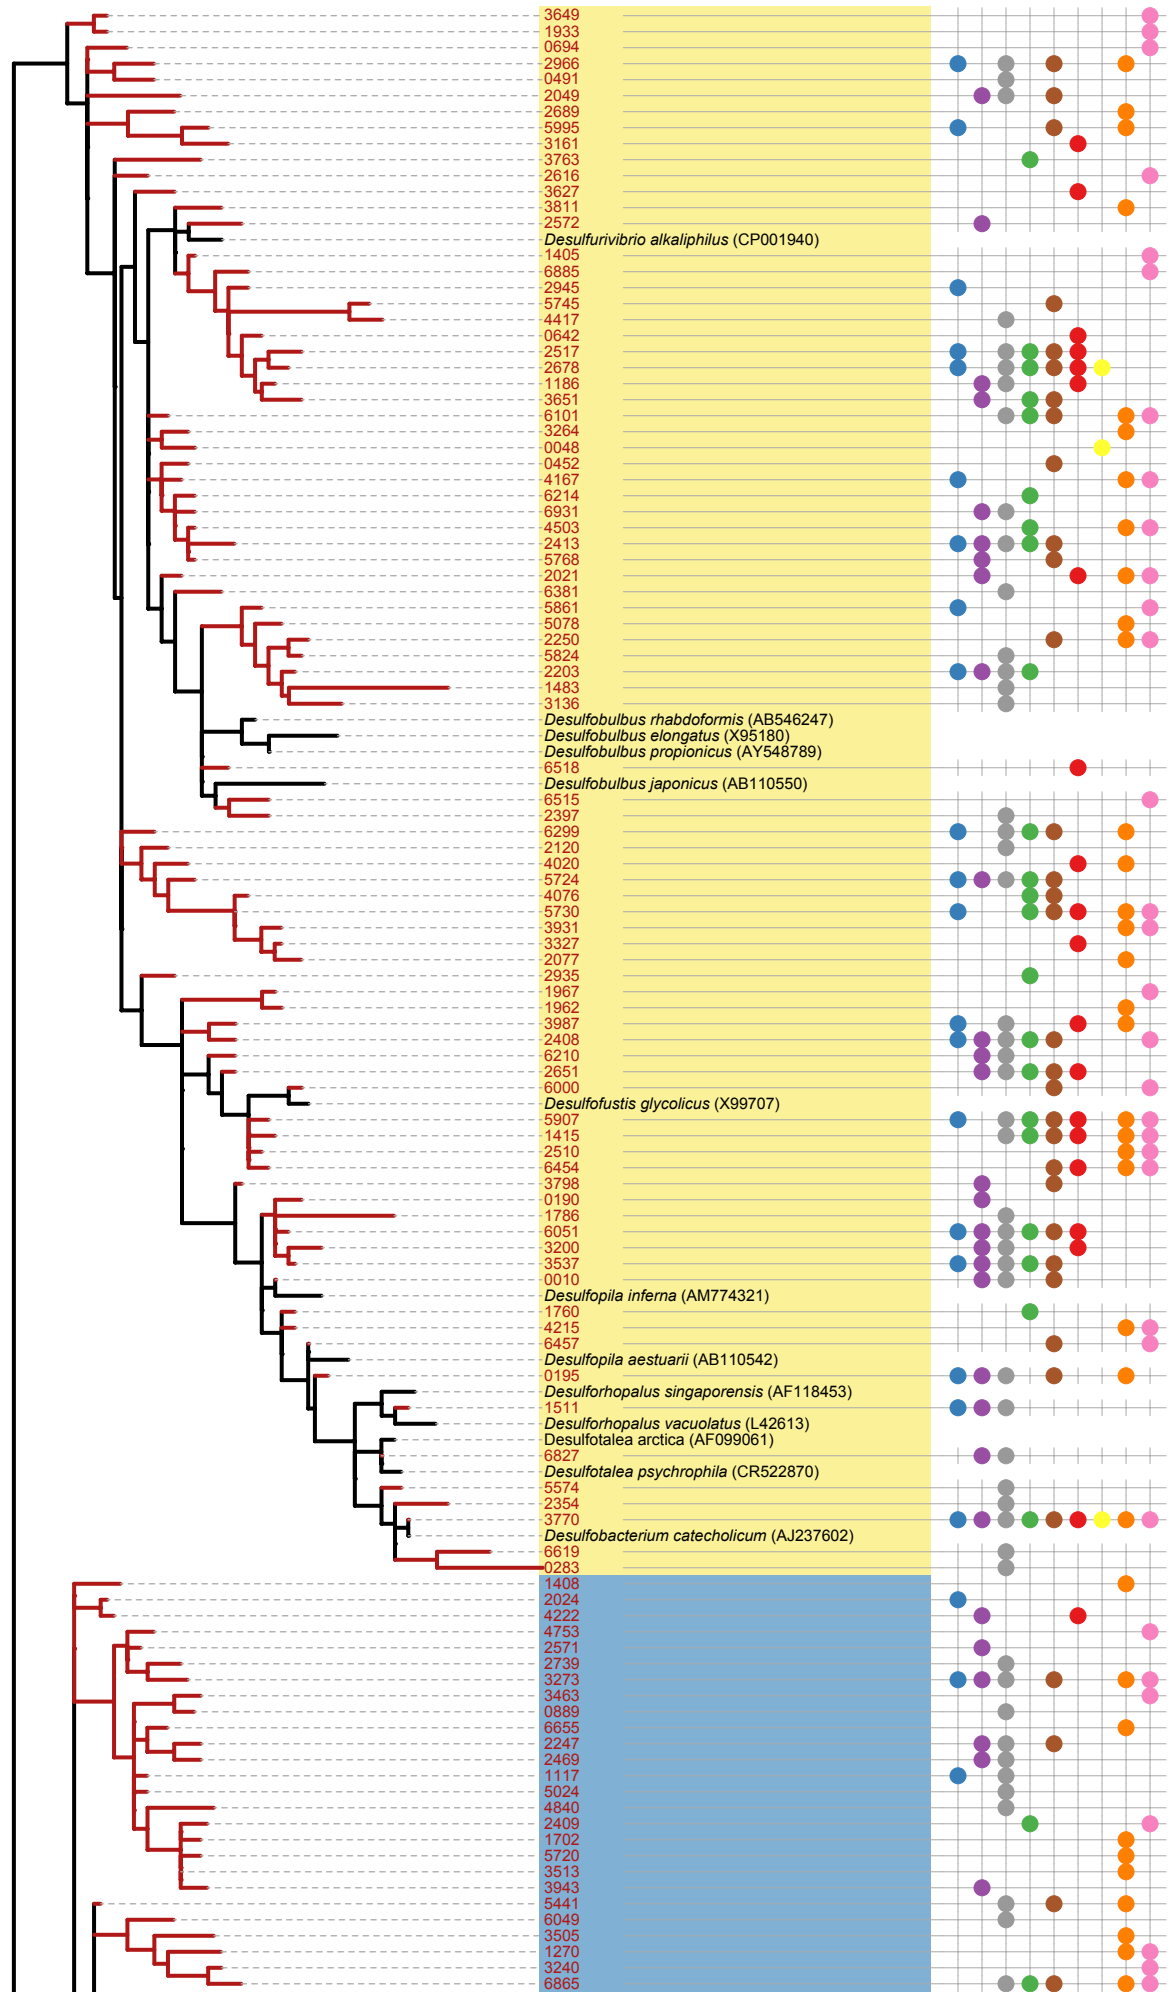

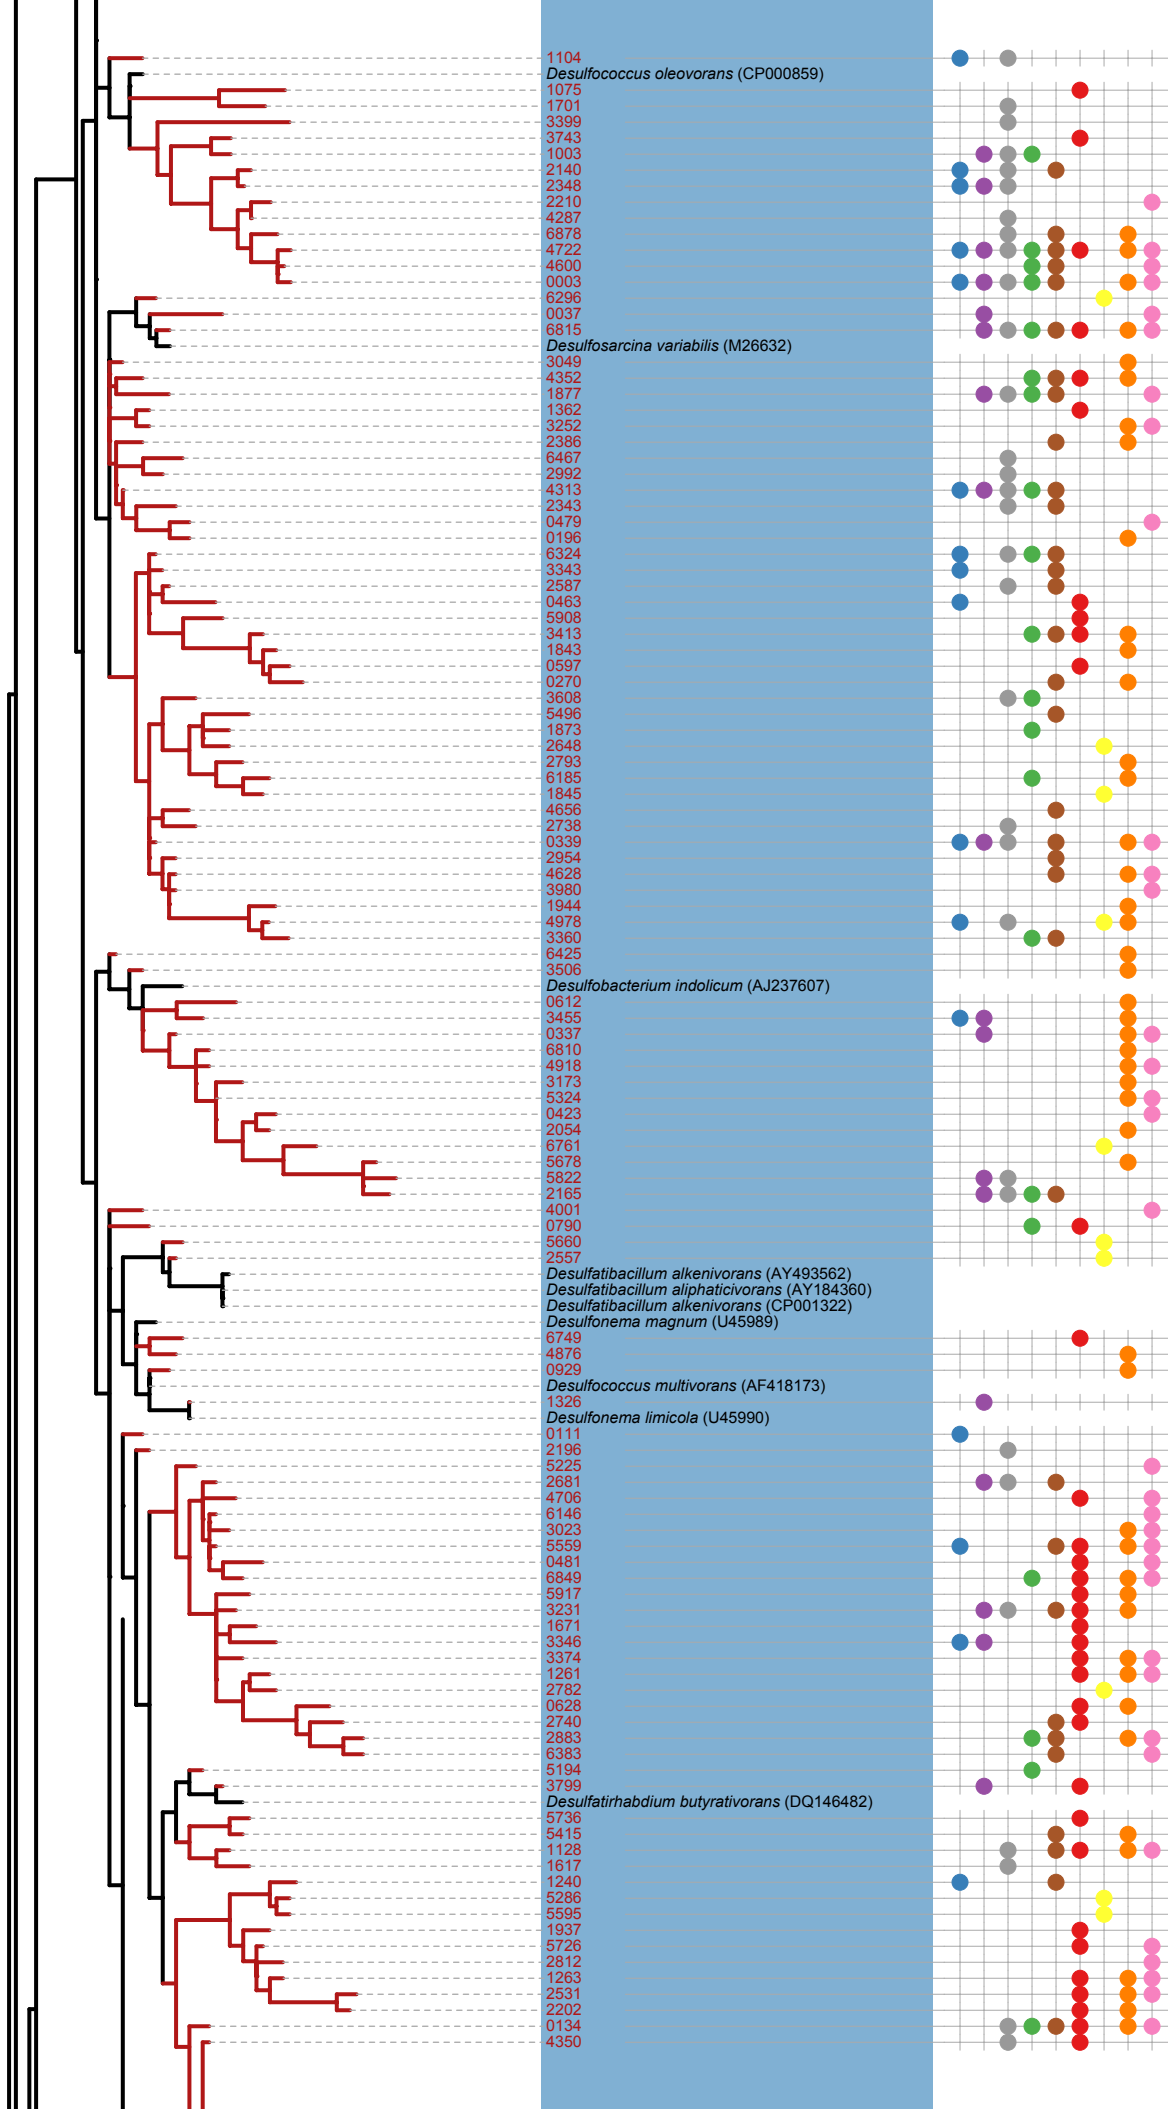

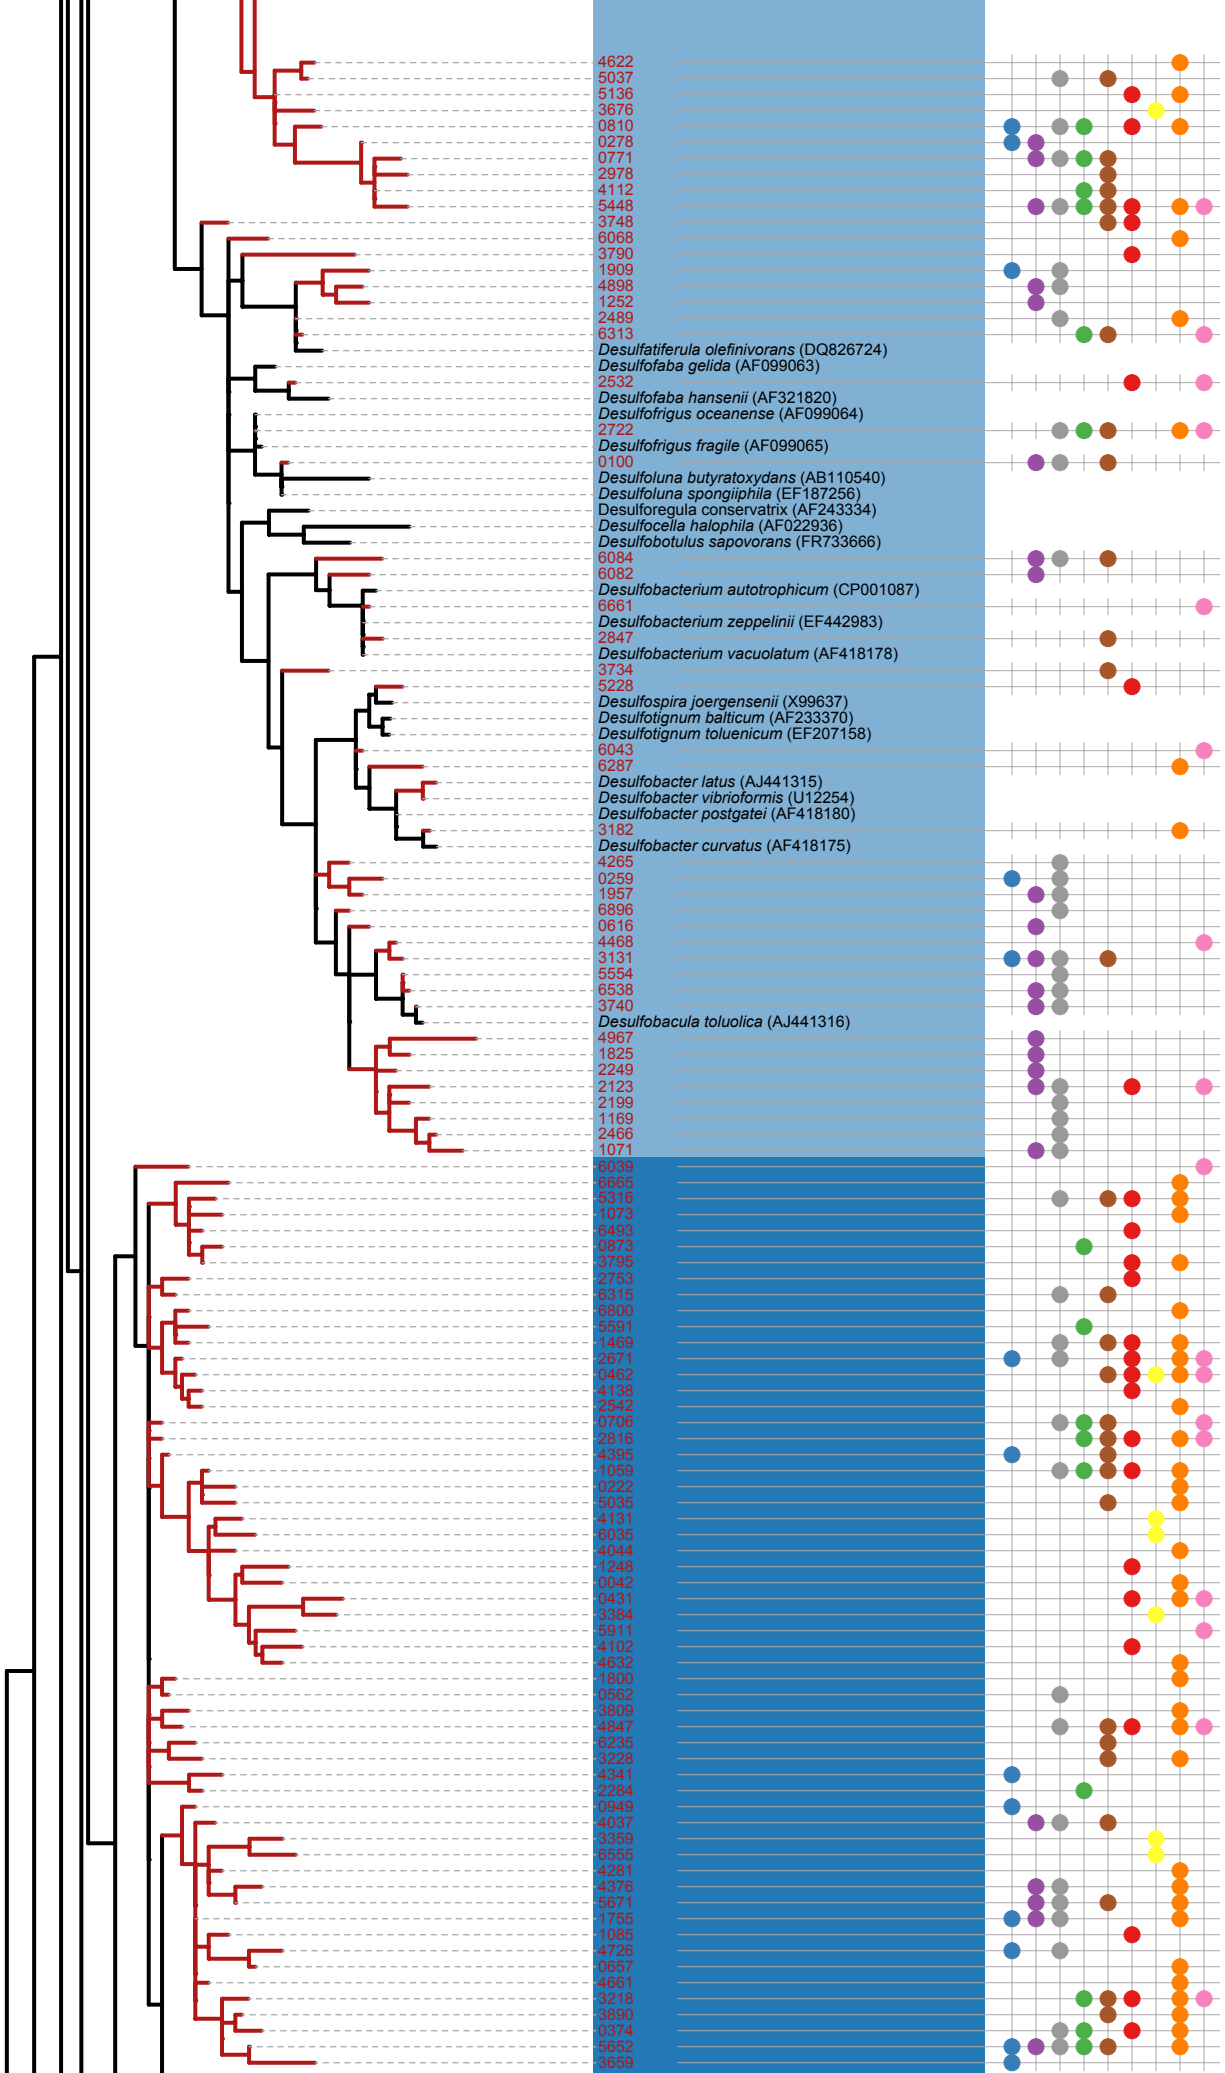

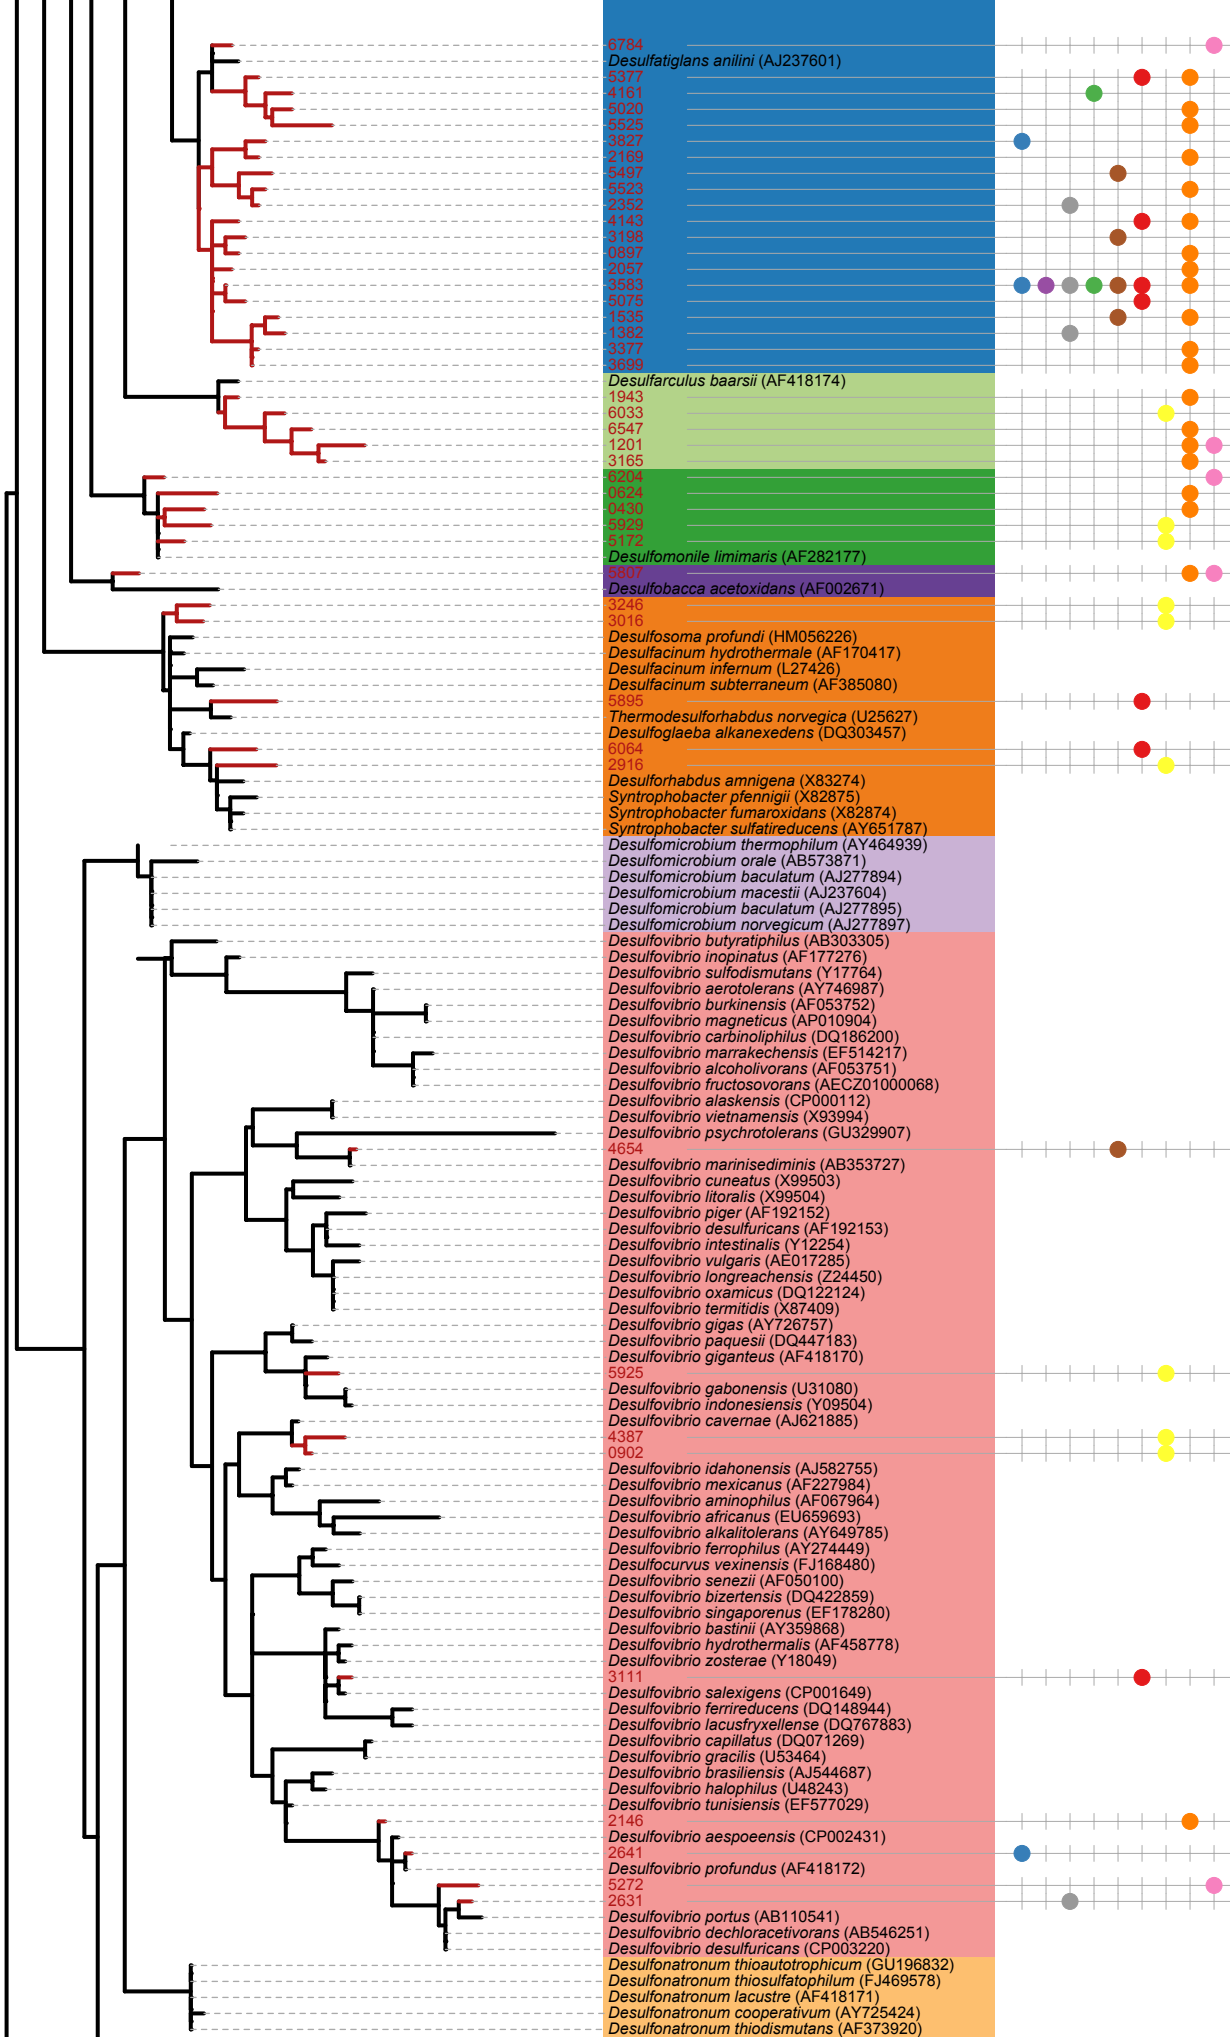

10%

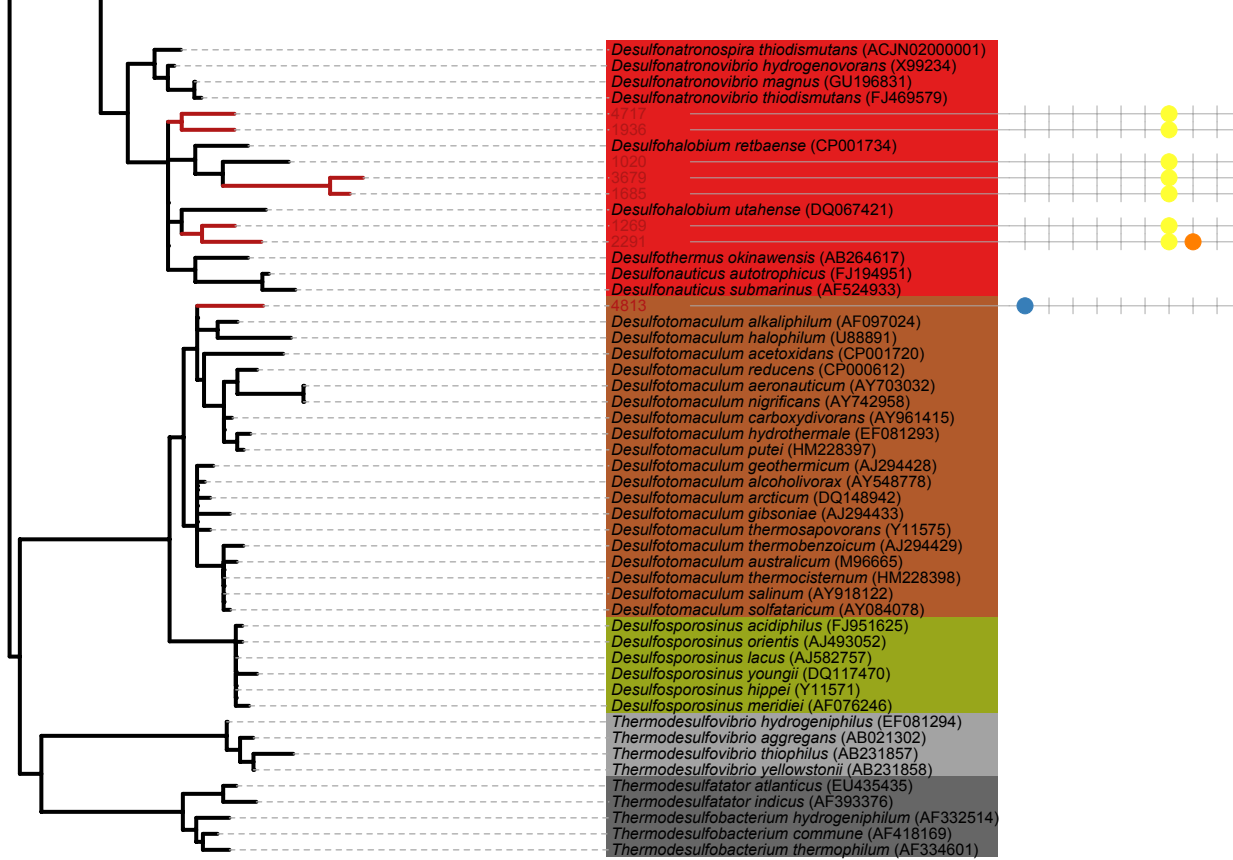

Supplement: ismej2015157x3.pdf [file ismej2015157x3.pdf]
