# Supplementary material
Source: PubMed Central journal article supplement (PMC4796921)

## A Relative abundance

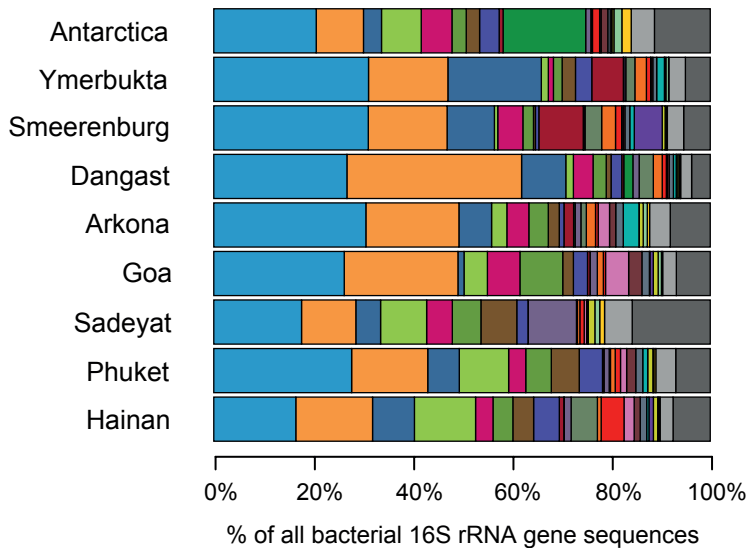

## B Number of phylotypes

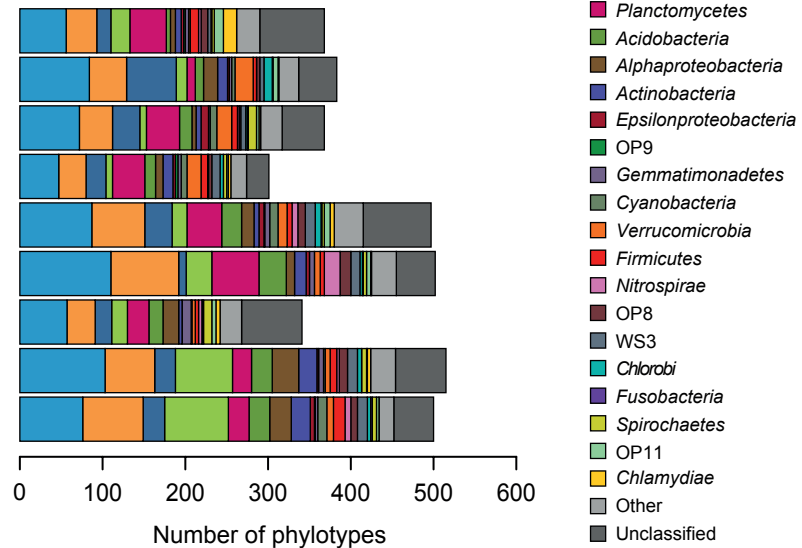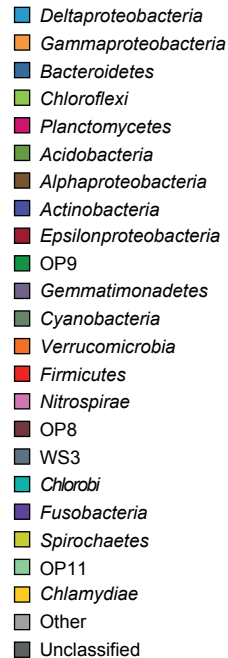

Supplement: ismej2015157x2.pdf [file ismej2015157x2.pdf]
